# Supplementary material for: Change in weight and waist circumference and risk of colorectal cancer: results from the Melbourne Collaborative Cohort Study
Source: Springer Nature journal article supplement (doi:10.1186/s12885-016-2144-1), 2016-02-25
Supplement: MOESM1 [file 9746070]

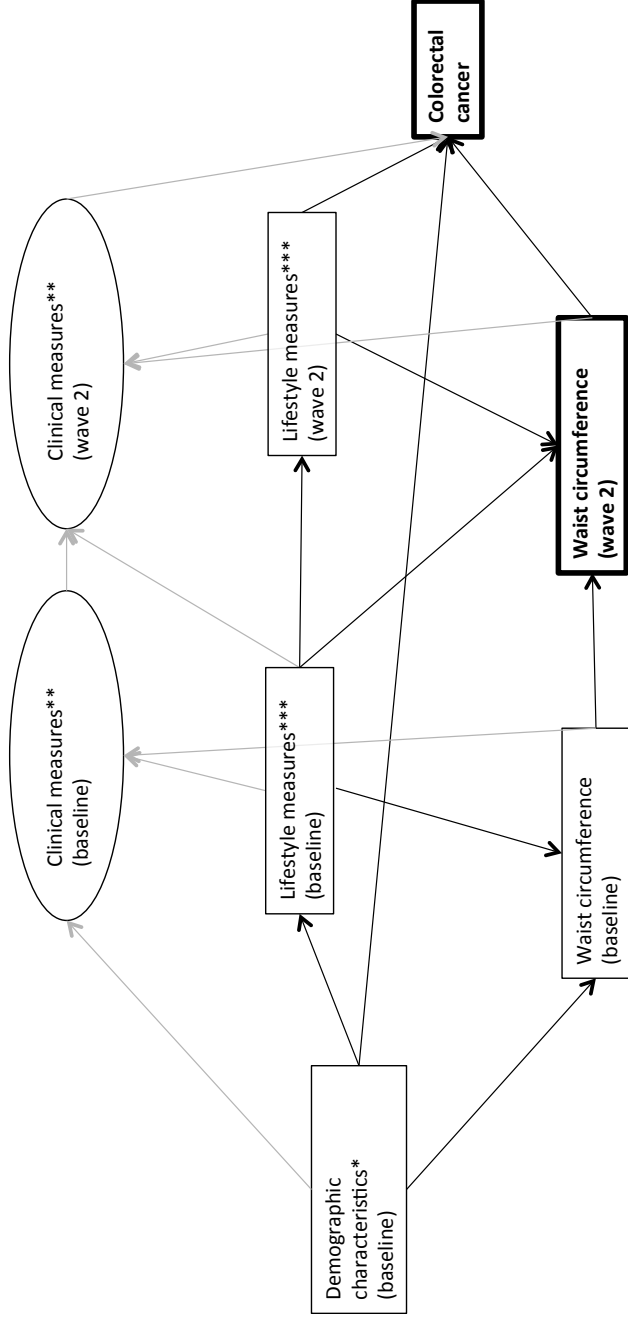

**Key:**

- \*Demographics include age, sex, country of birth and quintile of socioeconomic status based on SEIFA score
- \*\* Clinical measures include: diastolic blood pressure, systolic blood pressure and pulse
- \*\*\* Lifestyle measures include: Mediterranean diet score, physical activity and smoking status

Oval nodes - exposures not included in the Cox model  
 Rectangular nodes - exposures included in the Cox model  
 Rectangular nodes in bold indicate the exposure and outcome of interest  
 Grey lines denote paths to/from variables not included in the Cox model  
 Black lines denote paths to/from variables included in the Cox model

Additional file 1: Causal diagram used to select additional confounding variables included in the analysis models
