# Supplementary material for: Change in weight and waist circumference and risk of colorectal cancer: results from the Melbourne Collaborative Cohort Study
Source: Springer Nature journal article supplement (doi:10.1186/s12885-016-2144-1), 2016-02-25
Supplement: MOESM2 [file 9746070]

Additional file 2: Distribution of baseline characteristics of the Melbourne Collaborative Cohort Study participants

|                                   | Wave 2 attendance |       |          |      |                |      |           |      |
|-----------------------------------|-------------------|-------|----------|------|----------------|------|-----------|------|
|                                   | Baseline          |       | Attended |      | Did not attend |      |           |      |
|                                   | n                 | %     | n        | %    | Alive<br>n     | %    | Died<br>n | %    |
| <b>Participants</b>               | 41 514            | 100.0 | 26 984   | 65.0 | 10 731         | 25.8 | 3799      | 9.2  |
| <b>Sex</b>                        |                   |       |          |      |                |      |           |      |
| Male                              | 17 045            | 41.1  | 10 646   | 39.5 | 4217           | 39.3 | 2182      | 57.4 |
| Female                            | 24 469            | 58.9  | 16 338   | 60.5 | 6514           | 60.7 | 1617      | 42.6 |
| <b>Age(years)</b>                 |                   |       |          |      |                |      |           |      |
| <50                               | 13 152            | 31.7  | 9400     | 34.8 | 3465           | 32.3 | 287       | 7.6  |
| 50-59                             | 13 507            | 32.5  | 9176     | 34.0 | 3508           | 32.7 | 823       | 21.7 |
| ≥60                               | 14 855            | 35.8  | 8408     | 31.2 | 3758           | 35.0 | 2689      | 70.8 |
| <b>Country of birth</b>           |                   |       |          |      |                |      |           |      |
| Australia/New Zealand/UK          | 31 558            | 76.0  | 22 048   | 81.7 | 6727           | 62.7 | 2783      | 73.3 |
| Southern Europe                   | 9956              | 24.0  | 4936     | 18.3 | 4004           | 37.3 | 1016      | 26.7 |
| <b>Highest level of education</b> |                   |       |          |      |                |      |           |      |
| Less than primary school          | 8046              | 19.4  | 3774     | 14.0 | 3274           | 30.5 | 998       | 26.3 |
| Some high school                  | 15 853            | 38.2  | 10 218   | 37.9 | 4123           | 38.4 | 1512      | 39.8 |
| Completed high school             | 8576              | 20.7  | 5826     | 21.6 | 1962           | 18.3 | 788       | 20.8 |
| Degree/diploma                    | 9030              | 21.8  | 7164     | 26.6 | 1368           | 12.8 | 498       | 13.1 |
| <b>Living alone</b>               |                   |       |          |      |                |      |           |      |
| Not living alone                  | 35 456            | 85.4  | 23 119   | 85.7 | 9260           | 86.3 | 3077      | 81.1 |
| Living alone                      | 6049              | 14.6  | 3863     | 14.3 | 1467           | 13.7 | 719       | 18.9 |
| <b>Alcohol intake<sup>1</sup></b> |                   |       |          |      |                |      |           |      |
| Lifetime abstainers               | 11 871            | 28.6  | 7005     | 26.0 | 3764           | 35.1 | 1102      | 29.1 |
| Ex-drinkers                       | 1663              | 4.0   | 963      | 3.6  | 462            | 4.3  | 238       | 6.3  |
| Low intake                        | 22 515            | 54.3  | 15 387   | 57.0 | 5272           | 49.2 | 1856      | 49.1 |
| Moderate intake                   | 3599              | 8.7   | 2507     | 9.3  | 735            | 6.9  | 357       | 9.4  |
| High intake                       | 1827              | 4.4   | 1113     | 4.1  | 484            | 4.5  | 230       | 6.1  |
| <b>Mediterranean diet score</b>   |                   |       |          |      |                |      |           |      |
| ≤3                                | 9797              | 23.6  | 6097     | 22.6 | 2661           | 24.8 | 1039      | 27.5 |
| 4                                 | 8725              | 21.0  | 5607     | 20.8 | 2306           | 21.5 | 812       | 21.5 |
| 5                                 | 9624              | 23.2  | 6286     | 23.3 | 2498           | 23.3 | 840       | 22.2 |
| 6                                 | 7887              | 19.0  | 5275     | 19.6 | 1947           | 18.2 | 665       | 17.6 |
| ≥7                                | 5435              | 13.1  | 3708     | 13.7 | 1300           | 12.1 | 427       | 11.3 |
| <b>Physical activity score</b>    |                   |       |          |      |                |      |           |      |
| None - 0                          | 9223              | 22.2  | 5529     | 20.5 | 2800           | 26.1 | 894       | 23.6 |
| Low - >0 & <4                     | 8326              | 20.1  | 5458     | 20.2 | 2167           | 20.2 | 701       | 18.5 |
| Moderate - ≥4 & <6                | 14 776            | 35.6  | 9398     | 34.8 | 3803           | 35.5 | 1575      | 41.5 |
| High - ≥6                         | 9180              | 22.1  | 6597     | 24.4 | 1957           | 18.2 | 626       | 16.5 |
| <b>Marital status</b>             |                   |       |          |      |                |      |           |      |

<sup>1</sup>Categories of alcohol intake are in grams/day as follows:

Low: Males: 1-39; Females: 1-19

Medium: Males: 40-59; Females: 20-39

High: Males: 60+; Females: 40+

|                                                     | Wave 2 attendance |      |          |      |                |      |      |      |
|-----------------------------------------------------|-------------------|------|----------|------|----------------|------|------|------|
|                                                     | Baseline          |      | Attended |      | Did not attend |      | Died |      |
|                                                     | n                 | %    | n        | %    | n              | %    | n    | %    |
| Married                                             | 28 500            | 71.8 | 18 718   | 71.9 | 7269           | 72.0 | 2513 | 70.4 |
| Single                                              | 3615              | 9.1  | 2444     | 9.4  | 849            | 8.4  | 322  | 9.0  |
| Divorced                                            | 3114              | 7.8  | 2056     | 7.9  | 825            | 8.2  | 233  | 6.5  |
| de Facto                                            | 747               | 1.9  | 560      | 2.2  | 164            | 1.6  | 23   | 0.6  |
| Widow                                               | 2801              | 7.1  | 1666     | 6.4  | 731            | 7.2  | 404  | 11.3 |
| Separated                                           | 914               | 2.3  | 576      | 2.2  | 264            | 2.6  | 74   | 2.1  |
| <b>Smoking status</b>                               |                   |      |          |      |                |      |      |      |
| Never smokers                                       | 23 819            | 57.4 | 16 212   | 60.1 | 5991           | 55.8 | 1616 | 42.6 |
| Former smokers                                      | 12 997            | 31.3 | 8328     | 30.9 | 3162           | 29.5 | 1507 | 39.7 |
| Current smokers                                     | 4688              | 11.3 | 2441     | 9.0  | 1574           | 14.7 | 673  | 17.7 |
| <b>Index of Relative Socioeconomic Disadvantage</b> |                   |      |          |      |                |      |      |      |
| 1st Quintile (most disadvantaged)                   | 6083              | 14.7 | 3476     | 12.9 | 1918           | 17.9 | 689  | 18.2 |
| 2nd Quintile                                        | 8620              | 20.8 | 5014     | 18.6 | 2653           | 24.8 | 953  | 25.2 |
| 3rd Quintile                                        | 7668              | 18.5 | 4801     | 17.8 | 2116           | 19.8 | 751  | 19.8 |
| 4th Quintile                                        | 8447              | 20.4 | 5818     | 21.6 | 1975           | 18.5 | 654  | 17.3 |
| 5th Quintile (least disadvantaged)                  | 10 559            | 25.5 | 7798     | 29.0 | 2024           | 18.9 | 737  | 19.5 |
