# Supplementary material for: Change in weight and waist circumference and risk of colorectal cancer: results from the Melbourne Collaborative Cohort Study
Source: Springer Nature journal article supplement (doi:10.1186/s12885-016-2144-1), 2016-02-25
Supplement: MOESM3 [file 9746070]

Additional file 3: Distribution of baseline characteristics of the Melbourne Collaborative Cohort Study participants by change in anthropometric measure

|                                                 | Weight (kg) |     | Waist (cm) |     | Hips (cm) |     |
|-------------------------------------------------|-------------|-----|------------|-----|-----------|-----|
|                                                 | Mean        | SD  | Mean       | SD  | Mean      | SD  |
| All participants                                | 7.0         | 7.3 | 2.2        | 5.8 | 3.4       | 5.9 |
| <b>Sex</b>                                      |             |     |            |     |           |     |
| Male                                            | 5.4         | 6.6 | 1.7        | 5.4 | 2.8       | 5.0 |
| Female                                          | 8.0         | 7.5 | 2.5        | 6.0 | 3.8       | 6.3 |
| <b>Country of birth</b>                         |             |     |            |     |           |     |
| Australia/New Zealand/UK                        | 6.9         | 7.3 | 2.2        | 5.8 | 3.4       | 5.8 |
| Southern Europ                                  | 7.2         | 7.5 | 2.5        | 5.8 | 3.6       | 6.0 |
| <b>Quintiles of socio-economic disadvantage</b> |             |     |            |     |           |     |
| 1st quintile (most disadvantaged)               | 7.4         | 7.8 | 2.3        | 6.2 | 3.7       | 6.4 |
| 2nd quintile                                    | 7.1         | 7.6 | 2.4        | 6.1 | 3.6       | 6.1 |
| 3rd quintile                                    | 7.0         | 7.3 | 2.3        | 5.8 | 3.5       | 5.9 |
| 4th quintile                                    | 7.0         | 7.2 | 2.3        | 5.7 | 3.5       | 5.8 |
| 5th quintile (least disadvantaged)              | 6.7         | 7.0 | 1.9        | 5.4 | 3.1       | 5.5 |
| <b>Physical activity score</b>                  |             |     |            |     |           |     |
| None - 0                                        | 7.3         | 7.6 | 2.4        | 6.1 | 3.7       | 6.2 |
| Low - >0 and <4                                 | 7.0         | 7.1 | 2.2        | 5.7 | 3.4       | 5.9 |
| Moderate - $\geq 4$ and <6                      | 7.0         | 7.3 | 2.0        | 5.8 | 3.4       | 5.8 |
| High - $\geq 6$                                 | 6.8         | 7.1 | 2.3        | 5.4 | 3.3       | 5.6 |
| <b>Mediterranean diet score</b>                 |             |     |            |     |           |     |
| $\leq 3$                                        | 7.0         | 7.5 | 2.3        | 6.1 | 3.4       | 6.0 |
| 4                                               | 7.1         | 7.4 | 2.3        | 5.9 | 3.5       | 5.9 |
| 5                                               | 7.0         | 7.3 | 2.2        | 5.8 | 3.4       | 5.9 |
| 6                                               | 6.9         | 7.2 | 2.1        | 5.5 | 3.3       | 5.8 |
| $\geq 7$                                        | 6.8         | 6.9 | 2.0        | 5.5 | 3.2       | 5.5 |
| <b>Family history of any cancer</b>             |             |     |            |     |           |     |
| No                                              | 7.0         | 7.3 | 2.3        | 5.8 | 3.5       | 5.8 |
| Yes                                             | 6.9         | 7.3 | 2.0        | 5.8 | 3.3       | 5.9 |
| <b>Cumulative smoking status</b>                |             |     |            |     |           |     |
| Lifetime abstainer                              | 7.0         | 7.3 | 2.2        | 5.6 | 3.5       | 5.9 |
| Quit before baseline                            | 6.5         | 7.2 | 1.9        | 5.7 | 3.1       | 5.7 |
| Quit between baseline and follow-up             | 9.7         | 7.3 | 4.9        | 6.2 | 5.0       | 5.9 |
| Current                                         | 6.8         | 7.7 | 2.0        | 6.4 | 2.9       | 6.0 |
| <b>Physical activity score at follow-up</b>     |             |     |            |     |           |     |
| None - 0                                        | 7.2         | 8.0 | 2.2        | 6.9 | 3.8       | 6.5 |
| Low - >0 and <4                                 | 8.0         | 7.4 | 3.0        | 6.3 | 4.4       | 6.3 |
| Moderate - $\geq 4$ and <6                      | 7.2         | 7.5 | 2.3        | 5.9 | 3.5       | 5.9 |
| High - $\geq 6$                                 | 6.7         | 7.1 | 2.1        | 5.5 | 3.2       | 5.7 |
| <b>Mediterranean diet score at follow-up</b>    |             |     |            |     |           |     |
| $\leq 3$                                        | 7.1         | 7.4 | 2.4        | 6.1 | 3.6       | 5.9 |
| 4                                               | 7.2         | 7.3 | 2.4        | 5.8 | 3.4       | 6.0 |
| 5                                               | 7.0         | 7.3 | 2.2        | 5.6 | 3.4       | 5.8 |
| 6                                               | 6.9         | 7.2 | 2.1        | 5.6 | 3.4       | 5.8 |
| $\geq 7$                                        | 6.5         | 7.1 | 1.8        | 5.4 | 3.0       | 5.6 |
