# Supplementary material for: Change in weight and waist circumference and risk of colorectal cancer: results from the Melbourne Collaborative Cohort Study
Source: Springer Nature journal article supplement (doi:10.1186/s12885-016-2144-1), 2016-02-25
Supplement: MOESM4 [file 9746070]

Additional file 4: Spearman rank correlations between body size measured at baseline and wave 2 and change in body size in the Melbourne Collaborative Cohort Study

|                 | Baseline      |                |              | Wave 2        |                |              | Absolute change |                |              |
|-----------------|---------------|----------------|--------------|---------------|----------------|--------------|-----------------|----------------|--------------|
|                 | Waist<br>(cm) | Weight<br>(kg) | Hips<br>(cm) | Waist<br>(cm) | Weight<br>(kg) | Hips<br>(cm) | Waist<br>(cm)   | Weight<br>(kg) | Hips<br>(cm) |
| Baseline        | 1.00          |                |              |               |                |              |                 |                |              |
|                 | Waist(cm)     | 1.00           |              |               |                |              |                 |                |              |
|                 | Weight(kg)    | 0.85           | 1.00         |               |                |              |                 |                |              |
|                 | Hips(cm)      | 0.65           | 0.70         | 1.00          |                |              |                 |                |              |
| Wave 2          |               |                |              |               |                |              |                 |                |              |
|                 | Waist(cm)     | 0.82           | 0.80         | 0.59          | 1.00           |              |                 |                |              |
|                 | Weight(kg)    | 0.75           | 0.91         | 0.64          | 0.86           | 1.00         |                 |                |              |
|                 | Hips(cm)      | 0.50           | 0.62         | 0.76          | 0.71           | 0.74         | 1.00            |                |              |
| Absolute change |               |                |              |               |                |              |                 |                |              |
|                 | Waist(cm)     | -0.24          | -0.03        | -0.05         | -              | -            | 1.00            |                |              |
|                 | Weight(kg)    | -0.10          | -0.05        | -0.02         | -              | -            | 0.64            | 1.00           |              |
|                 | Hips(cm)      | -0.12          | -0.01        | -0.20         | -              | -            | 0.65            | 0.61           | 1.00         |
