# Supplementary material for: Change in weight and waist circumference and risk of colorectal cancer: results from the Melbourne Collaborative Cohort Study
Source: Springer Nature journal article supplement (doi:10.1186/s12885-016-2144-1), 2016-02-25
Supplement: MOESM6 [file 9746070]

Additional file 6: Risk of colorectal cancer in relation to categories of change in anthropometric measures: Hazard Ratio and 95% CI

|                                      | Deaths | Person-years | Rate <sup>c</sup> | Model 1 <sup>a</sup> |              |         | Model 2 <sup>b</sup> |              |         |
|--------------------------------------|--------|--------------|-------------------|----------------------|--------------|---------|----------------------|--------------|---------|
|                                      |        |              |                   | HR                   | 95% CI       | p-value | HR                   | 95% CI       | p-value |
| <b>Waist change (cm)</b>             |        |              |                   |                      |              |         |                      |              |         |
| Loss ( $\leq -5$ cm)                 | 17     | 8,636        | 1.97              | 0.78                 | [0.47, 1.28] | 0.321   | 0.72                 | [0.43, 1.19] | 0.197   |
| Stable ( $\pm 5$ cm)                 | 155    | 68,288       | 2.27              | 1.00                 | -            | -       | 1.00                 | -            | -       |
| Small gain ( $> 5$ and $\leq 10$ cm) | 96     | 50,714       | 1.89              | 0.90                 | [0.70, 1.16] | 0.405   | 0.92                 | [0.72, 1.19] | 0.545   |
| Large gain ( $> 10$ cm)              | 105    | 58,691       | 1.79              | 0.95                 | [0.74, 1.22] | 0.693   | 0.99                 | [0.77, 1.28] | 0.952   |
| <b>Weight change (kg)</b>            |        |              |                   |                      |              |         |                      |              |         |
| Loss ( $\leq -3$ kg)                 | 87     | 28,830       | 3.02              | 1.20                 | [0.92, 1.56] | 0.175   | 1.10                 | [0.84, 1.43] | 0.493   |
| Stable ( $\pm 3$ kg)                 | 164    | 78,617       | 2.09              | 1.00                 | -            | -       | 1.00                 | -            | -       |
| Small gain ( $> 3$ and $\leq 8$ kg)  | 80     | 51,787       | 1.54              | 0.89                 | [0.68, 1.17] | 0.400   | 0.87                 | [0.66, 1.14] | 0.306   |
| Large gain ( $> 8$ kg)               | 42     | 27,096       | 1.55              | 1.06                 | [0.75, 1.50] | 0.743   | 0.97                 | [0.68, 1.37] | 0.858   |
| <b>Hips change (cm)</b>              |        |              |                   |                      |              |         |                      |              |         |
| Loss ( $\leq -3$ cm)                 | 46     | 23,091       | 1.99              | 0.87                 | [0.62, 1.21] | 0.403   | 0.80                 | [0.57, 1.12] | 0.187   |
| Stable ( $\pm 3$ cm)                 | 156    | 70,883       | 2.20              | 1.00                 | -            | -       | 1.00                 | -            | -       |
| Small gain ( $> 3$ and $\leq 8$ cm)  | 119    | 56,730       | 2.10              | 1.03                 | [0.81, 1.30] | 0.839   | 1.05                 | [0.83, 1.34] | 0.672   |
| Large gain ( $> 8$ cm)               | 52     | 35,625       | 1.46              | 0.78                 | [0.57, 1.07] | 0.125   | 0.81                 | [0.59, 1.11] | 0.186   |

<sup>a</sup> Model 1: Estimates adjusted for sex and country of birth.

<sup>b</sup> Model 2: Estimates adjusted for sex, country of birth, quintile of socioeconomic status, body size at baseline, cumulative smoking status, and the following covariates measured at baseline and wave 2: physical activity, Mediterranean diet score and living alone.

<sup>c</sup> Rate per 1,000 person-years
