# Supplementary material for: Change in weight and waist circumference and risk of colorectal cancer: results from the Melbourne Collaborative Cohort Study
Source: Springer Nature journal article supplement (doi:10.1186/s12885-016-2144-1), 2016-02-25
Supplement: MOESM7 [file 9746070]

Additional file 7: Risk of colorectal cancer in relation to 5 unit change in anthropometric measure by sex and previous history of disease: Hazard ratios and 95% CI

|                         | Cases (Person-years)         | HR   | 95% CI       | p-value | Cases (Person-years)      | HR   | 95% CI       | p-value |
|-------------------------|------------------------------|------|--------------|---------|---------------------------|------|--------------|---------|
|                         | <b>Males</b>                 |      |              |         | <b>Females</b>            |      |              |         |
| Hips change (per 5cm)   | 183 (71,645)                 | 1.02 | [0.99, 1.05] | 0.235   | 190 (114684)              | 0.99 | [0.97, 1.02] | 0.510   |
| Waist change (per 5cm)  | 183 (71,645)                 | 1.01 | [0.99, 1.04] | 0.287   | 190 (114684)              | 1.00 | [0.98, 1.02] | 0.954   |
| Weight change (per 5kg) | 183 (71,645)                 | 1.00 | [0.97, 1.03] | 0.869   | 190 (114684)              | 0.98 | [0.95, 1.00] | 0.085   |
|                         | <b>No history of disease</b> |      |              |         | <b>History of disease</b> |      |              |         |
| Hips change (per 5cm)   | 133 (54,571)                 | 0.99 | [0.97, 1.01] | 0.293   | 190 (114684)              | 1.02 | [0.99, 1.05] | 0.304   |
| Waist change (per 5cm)  | 133 (54,571)                 | 1.01 | [0.99, 1.03] | 0.465   | 190 (114684)              | 1.00 | [0.98, 1.02] | 0.996   |
| Weight change (per 5kg) | 133 (54,571)                 | 0.98 | [0.95, 1.00] | 0.039   | 190 (114684)              | 1.00 | [0.97, 1.03] | 0.805   |

<sup>a</sup> P-value from Cox proportional hazard model adjusted for sex, country of birth, family history of any cancer, quintile of socioeconomic status, baseline body size, cumulative smoking status and physical activity and Mediterranean diet score at baseline and wave 2.
